# Supplementary material for: Adhesion of Staphylococcus aureus to Corneocytes from Atopic Dermatitis Patients Is Controlled by Natural Moisturizing Factor Levels
Source: PubMed Central journal article supplement (PMC6094479; doi:10.1128/mbio.01184-18), 2018-08-14
Supplement: mbo004184009sf2.pdf [file mbo004184009sf2.pdf]

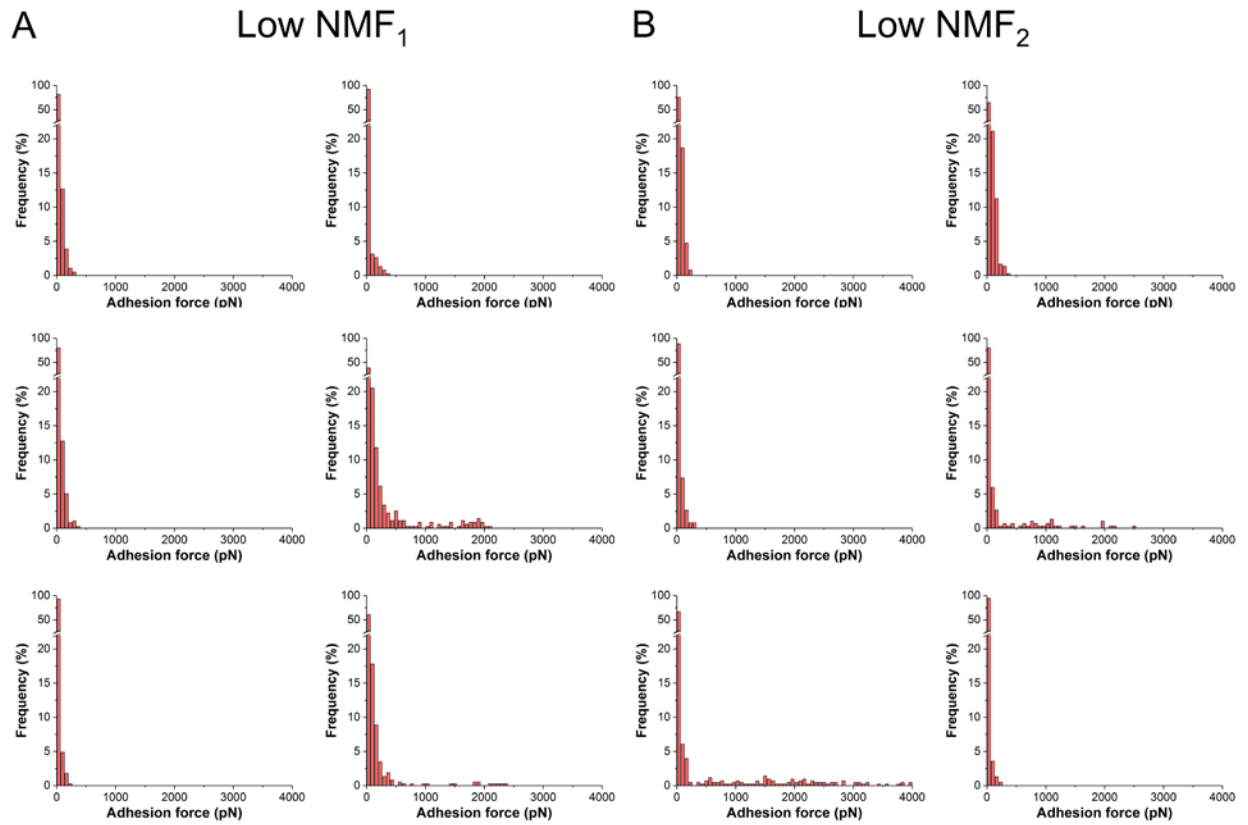

**Figure S2. Single-cell force spectroscopy of the interaction between *S. aureus* AD08  $\Delta$ *clfB* and AD skins.** Adhesion force histograms obtained in PBS between additional *S. aureus* AD08  $\Delta$ *clfB* bacteria and corneocytes from AD patients with low NMF levels. For each patient, 6 additional pairs are presented.
