# Supplementary material for: Adhesion of Staphylococcus aureus to Corneocytes from Atopic Dermatitis Patients Is Controlled by Natural Moisturizing Factor Levels
Source: PubMed Central journal article supplement (PMC6094479; doi:10.1128/mbio.01184-18), 2018-08-14
Supplement: mbo004184009sf3.pdf [file mbo004184009sf3.pdf]

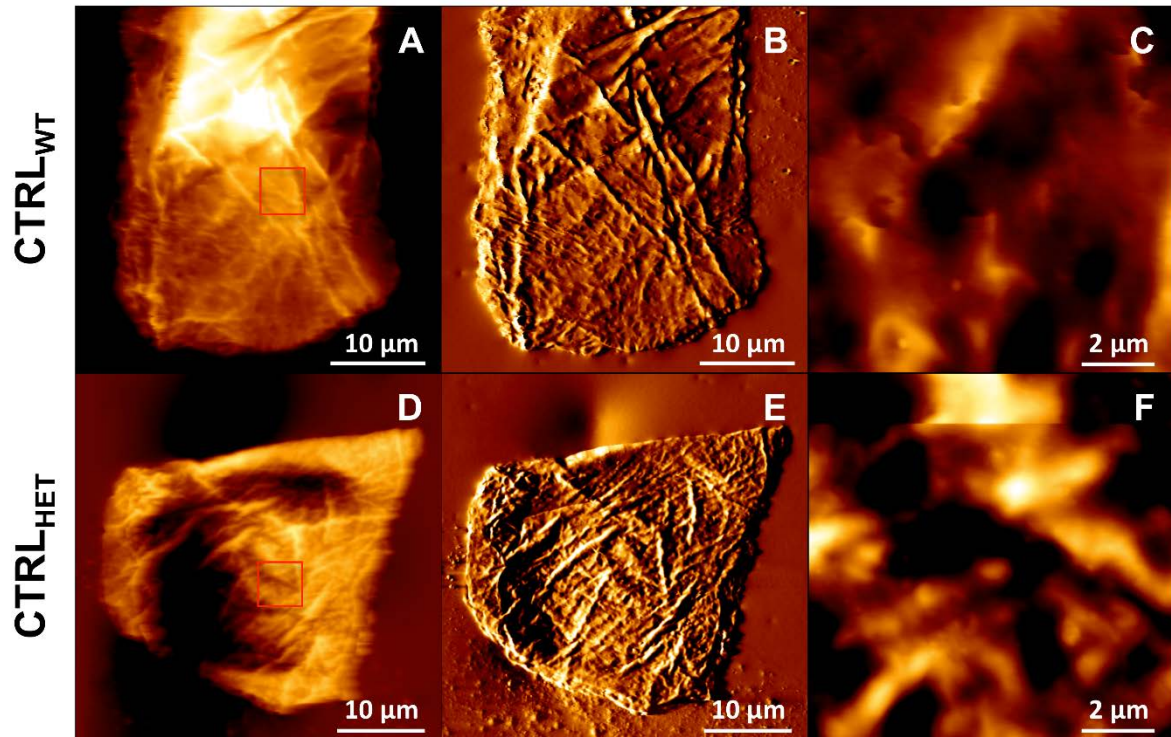

**Figure S3. Topographic imaging of non-AD skins.** (A, D) Height images (z-range = 1.5 μm) and (B, E) corresponding deflection images obtained for corneocytes from children unaffected by AD, and presenting either no detected *FLG* mutation (CTRL<sub>WT</sub>; NMF level = 1.32), or a *FLG* mutation (CTRL<sub>HET</sub>; NMF level = 0.28). (C, F) High-resolution height images recorded in the square areas shown in (A, D).
