# Supplementary material for: Adhesion of Staphylococcus aureus to Corneocytes from Atopic Dermatitis Patients Is Controlled by Natural Moisturizing Factor Levels
Source: PubMed Central journal article supplement (PMC6094479; doi:10.1128/mbio.01184-18), 2018-08-14
Supplement: mbo004184009sf4.pdf [file mbo004184009sf4.pdf]

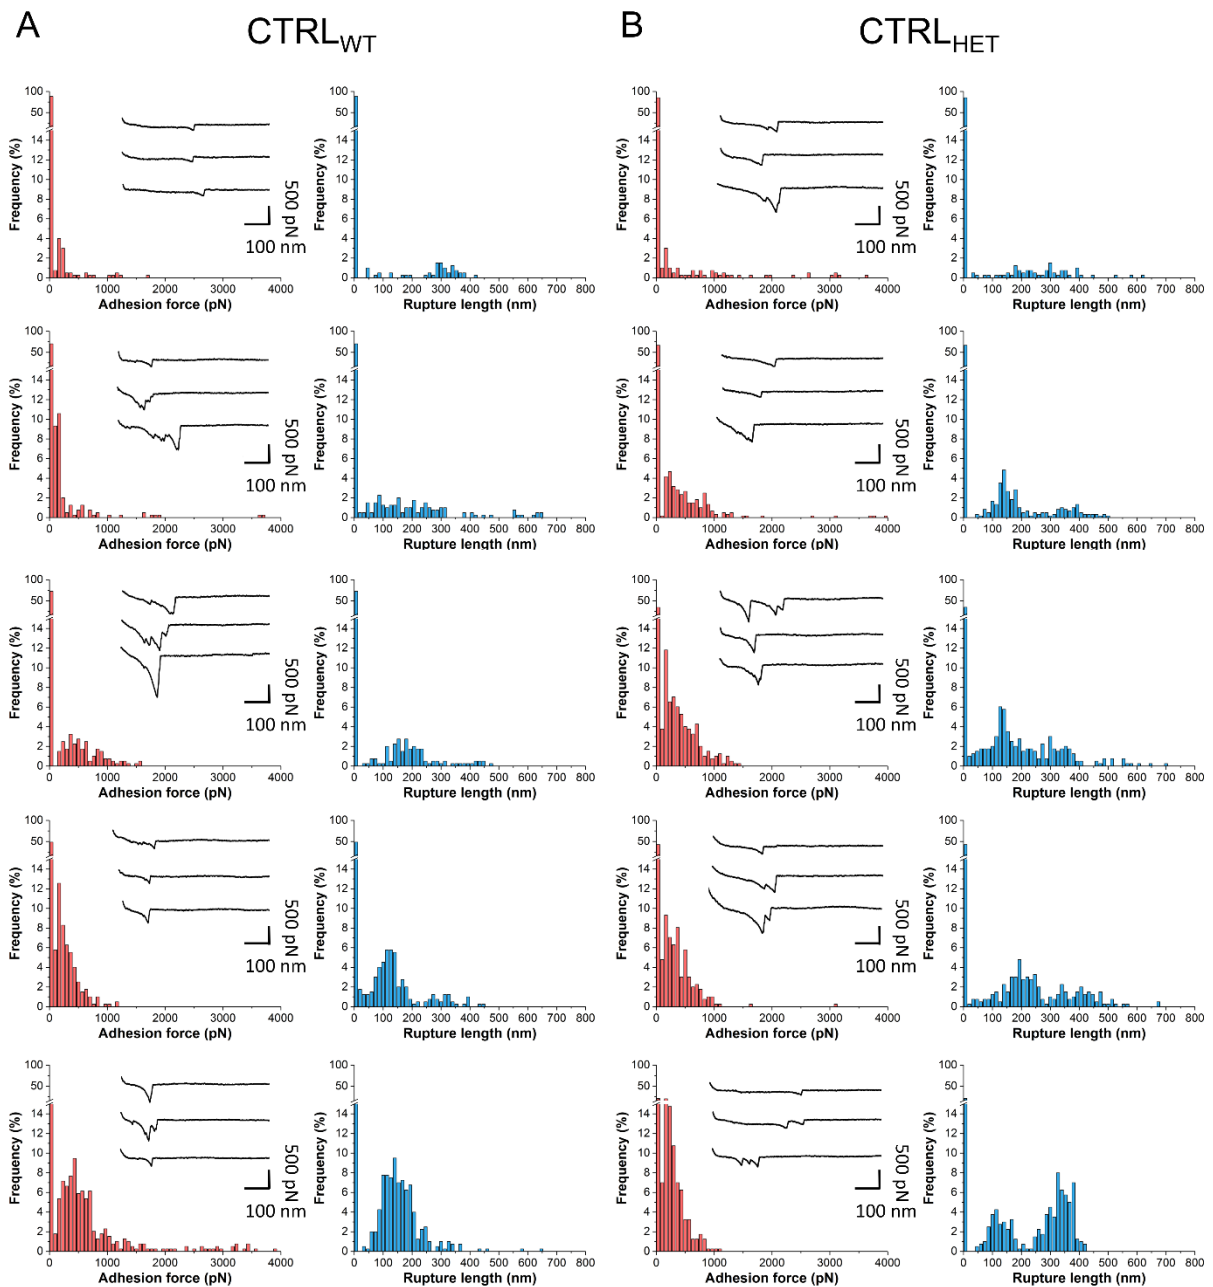

**Figure S4. Single-cell force spectroscopy of the interaction between *S. aureus* AD08 and non-AD skins.** (A, B) Adhesion force and rupture distance histograms with representative force profiles obtained in PBS between *S. aureus* AD08 bacteria and corneocytes from children unaffected by AD, CTRL<sub>WT</sub> (A) and CTRL<sub>HET</sub> (B).
