# Supplementary material for: Adhesion of Staphylococcus aureus to Corneocytes from Atopic Dermatitis Patients Is Controlled by Natural Moisturizing Factor Levels
Source: PubMed Central journal article supplement (PMC6094479; doi:10.1128/mbio.01184-18), 2018-08-14
Supplement: mbo004184009sf5.pdf [file mbo004184009sf5.pdf]

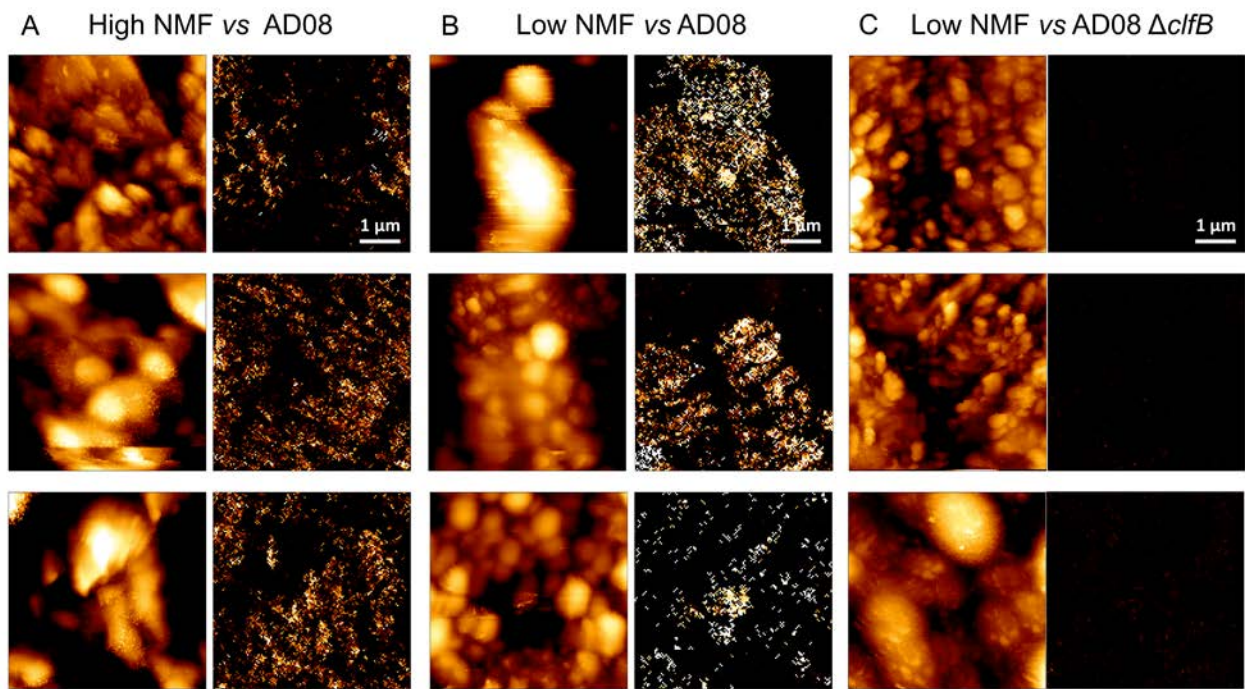

**Figure S5. Nanoscale adhesion imaging of AD skins using bacterial probes.** (A, B) Additional height (left) and adhesion (right) images of corneocytes recorded in PBS between *S. aureus* AD08 cell probes and high NMF<sub>2</sub> (A) or low NMF<sub>1</sub> (B) skin samples. (C) Images obtained on low NMF<sub>1</sub> corneocytes with AD08  $\Delta clfB$  cell probes.
